# Supplementary material for: A low caffeine dose improves maximal strength, but not relative muscular endurance in either heavier-or lighter-loads, or perceptions of effort or discomfort at task failure in females
Source: PeerJ journal article supplement (doi:10.7717/peerj.9144), 2020-05-14

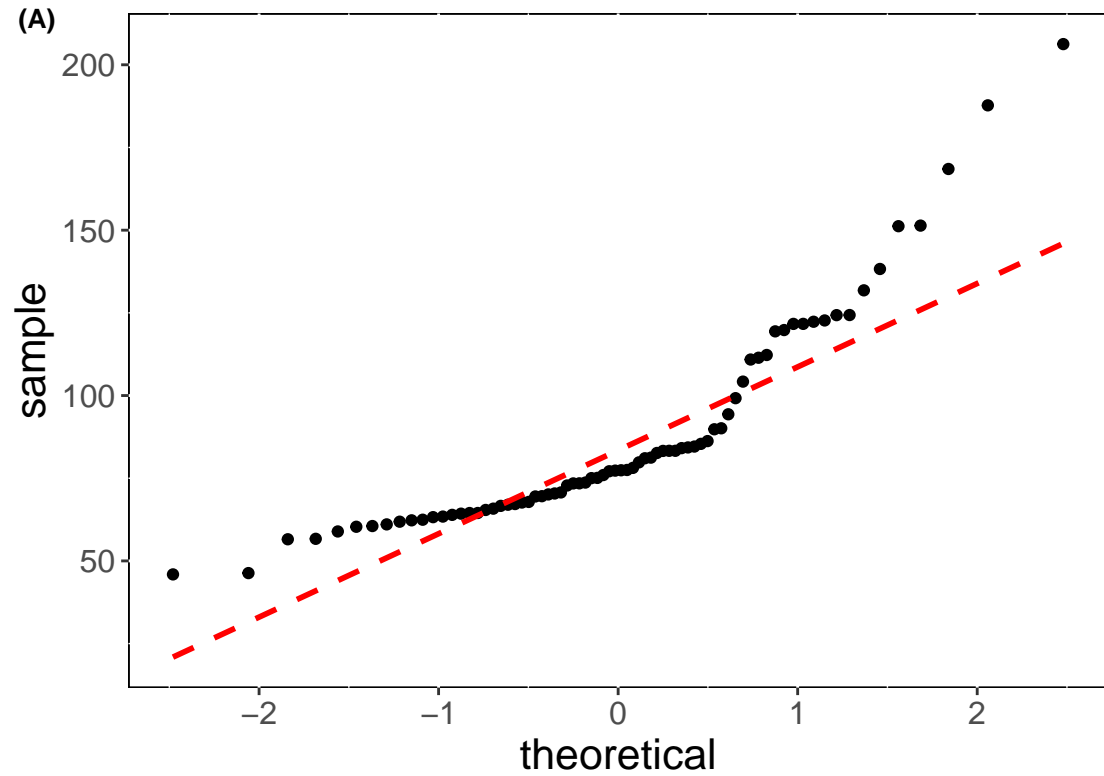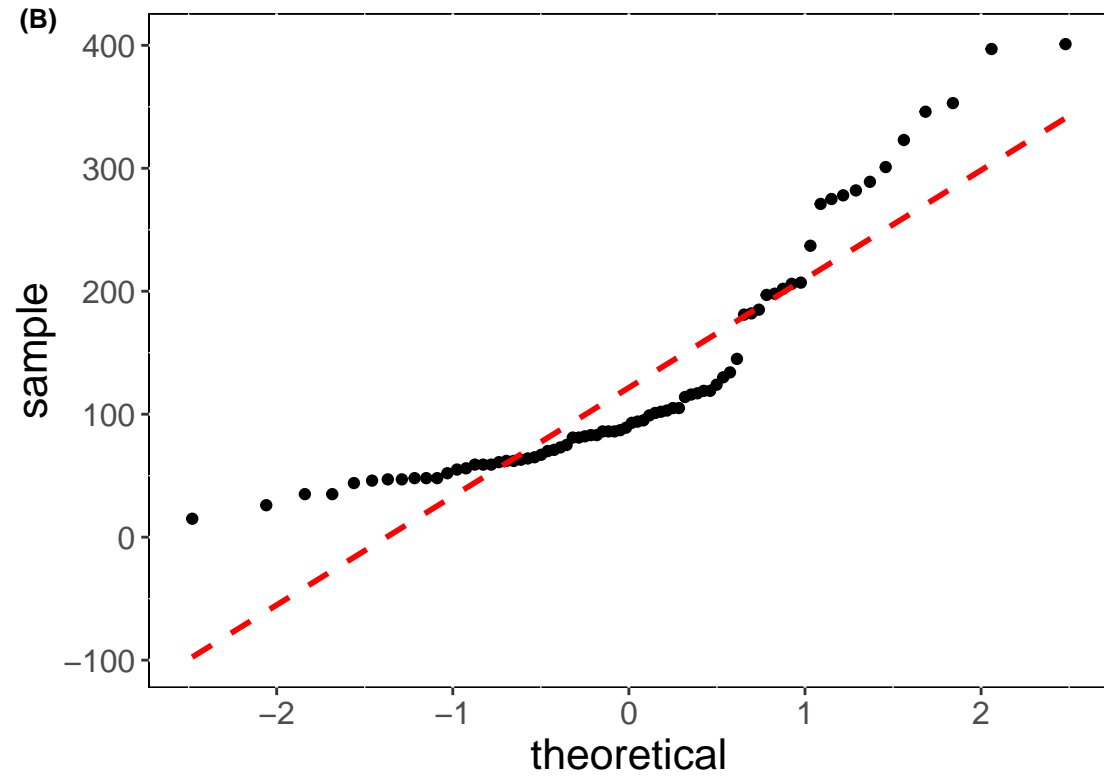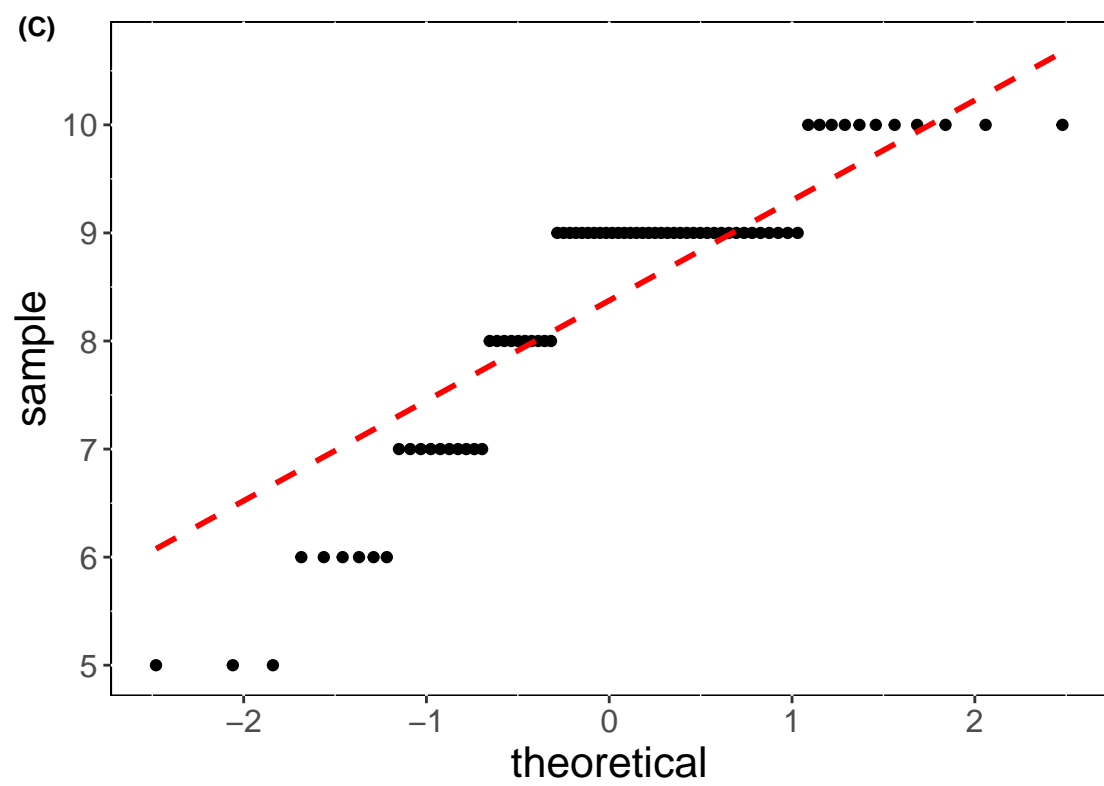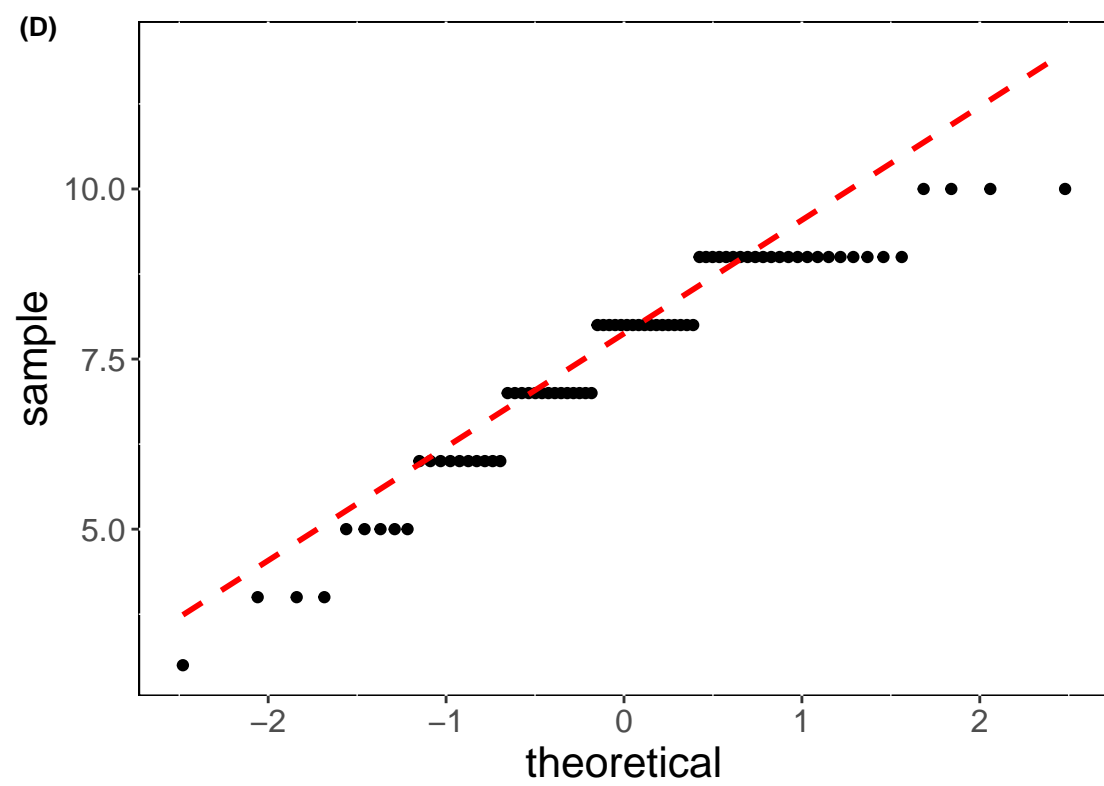

Supplement: qqplots.pdf [file qqplots.pdf]
